# Supplementary material for: Achieving high-performance narrowband blue MR-TADF emitters by suppressing isomer formation and extending π-conjugate skeletons
Source: Royal Society of Chemistry journal article supplement (doi:10.1039/d3tc00499f), 2023-01-01
Supplement: d3tc00499f1.pdf [file d3tc00499f1.pdf]

## Supporting Information

### **Achieving High-performance Narrowband Blue MR-TADF Emitter by Suppressing Isomer Formation and Extending $\pi$ -conjugate Skeleton**

Kaiyuan Di<sup>a</sup>, Runda Guo<sup>ac, \*</sup>, Yaxiong Wang<sup>a</sup>, Yingbo Lv<sup>b</sup>, Hanrui Su<sup>a</sup>, Qiang Zhang<sup>a</sup>, Bing Yang<sup>b</sup> and Lei Wang<sup>a, \*</sup>

<sup>a</sup> *Wuhan National Laboratory for Optoelectronics, Huazhong University of Science and Technology, Wuhan, 430074, People's Republic of China.*

<sup>b</sup> *State Key Laboratory of Supramolecular Structure and Materials, Jilin University, Changchun, 130012, People's Republic of China.*

<sup>c</sup> *State Key Laboratory of Luminescent Materials and Devices South China University of Technology, Guangzhou 510640, People's Republic of China.*

#### **Corresponding Author**

\*Email: [wanglei@mail.hust.edu.cn](mailto:wanglei@mail.hust.edu.cn).

\*Email: [runda\\_guo@hust.edu.cn](mailto:runda_guo@hust.edu.cn).

#### **Characterization.**

The intermediates and final compounds were confirmed by <sup>1</sup>H NMR or <sup>13</sup>C NMR spectra on a Bruker-AF301 AT 400 or 600 MHz spectrometer. Thermogravimetric analysis (TGA) was undertaken using a PerkinElmer Instruments Pyris1 TGA at a heating rate of 10 °C min<sup>-1</sup> from 30 to 600 °C under a nitrogen atmosphere. Mass spectra were recorded on high resolution Fourier-transform mass spectrometer. Differential scanning calorimetry (DSC) was measured under nitrogen on a PE Instruments DSC 2920 unit at a heating rate of 10 °C min<sup>-1</sup> from 30 to 300 °C. The thermal decomposition temperatures ( $T_d$ ) were corresponded to 5% weight loss temperatures. The glass transition temperature ( $T_g$ ) was determined from the second heating scan. The PL spectra and the transient photoluminescence spectra were recorded on an Edinburgh Instruments (FLS 920 spectrometer). The UV-vis absorption spectra were measured on

a Shimadzu UV-VIS-NIR Spectrophotometer (UV-3600) in the wavelength range of 190-1100 nm. The absolute PLQY tests were carried out using a Zolix OmniFluo spectrofluorometer equipped with a calibrated integrating sphere. Cyclic voltammetry was recorded on a computer-controlled EG&G Potentiostat/Galvanostat model 283 at room temperature with a conventional three-electrode system, which consisted of a platinum wire counter electrode, Ag/AgNO<sub>3</sub> (0.1 M) reference electrode, and a glassy carbon working electrode of 2 mm diameter. A 0.10 M tetrabutylammonium hexafluorophosphate (*n*-Bu<sub>4</sub>NPF<sub>6</sub>) solutions in dry dichloromethane and *N,N*-dimethylformamide were employed as the supporting electrolyte, and ferrocene was added as a calibrant in the whole measurement.

### **Device fabrication and measurements.**

The used ITO glass substrates, MoO<sub>3</sub>, LiF, TAPC, *m*CP, PPF and TmPyPB were commercially available. The devices were fabricated by evaporating organic layers on ITO (20 Ω square<sup>-1</sup>), which were precleaned carefully and treated with oxygen plasma for 5 min. The devices were deposited in the vacuum of  $2 \times 10^{-6}$  Torr. For all of the OLEDs, the emitting areas were determined by the overlap of two electrodes as 0.09 cm<sup>2</sup>. The *J-V-L* of the devices was measured using a Keithley 2400 source meter equipped with a calibrated silicon photodiode. The EL spectra were measured using a PR655 spectrometer. All measurements were carried out at room temperature under ambient conditions.

### **Calculation details.**

The density functional theory (DFT) and timed dependent DFT (TD-DFT) calculations were employed to optimize the ground state and excited state geometries and electronic properties, which were carried out with the B3LYP hybrid functional at the basis set level of 6-31G(d). the spin-orbit couplings (SOC) were calculated by def2-SVP basis set using BDF code.

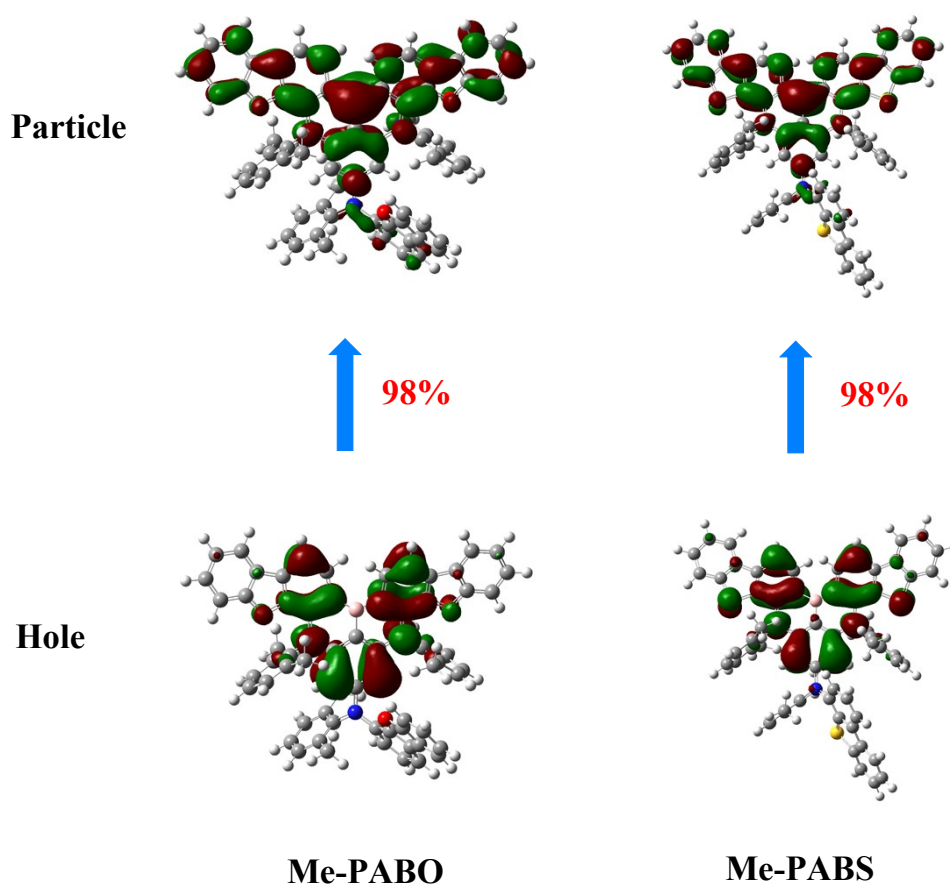

**Figure S1.** Highest occupied and lowest unoccupied natural transition orbitals (HONTOs and LUNTOs) for the  $S_1$  state of **Me-PABO** and **Me-PABS**.

**Table S1** Spin-orbit coupling (SOC) matrix elements between the low lying singlet and triplet excited states of the fluorophores with all values reported in  $\text{cm}^{-1}$

| SOC            | $S_1-T_1$ | $S_1-T_2$ | $S_1-T_3$ |
|----------------|-----------|-----------|-----------|
| <b>PAB</b>     | 0.0431    | 0.8495    | 0.0115    |
| <b>Me-PABO</b> | 0.0464    | 0.8300    | 0.3109    |
| <b>Me-PABS</b> | 0.0487    | 0.9400    | 0.3603    |

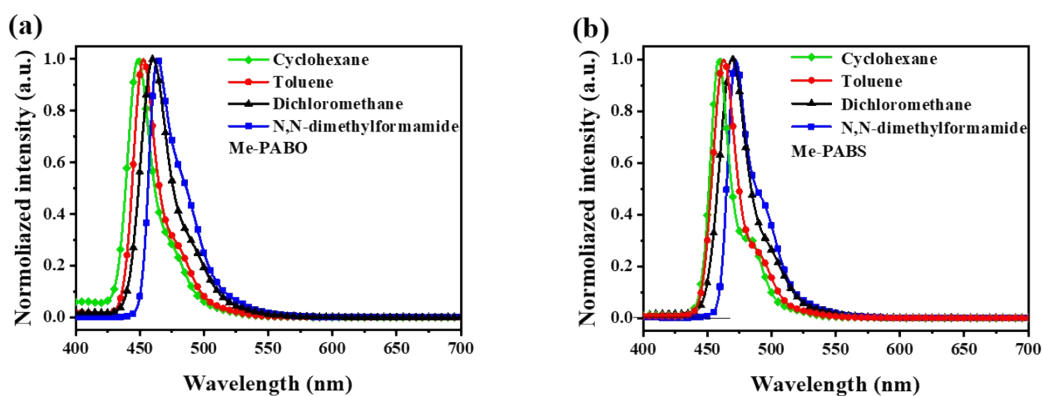

**Figure S2.** The fluorescence (FL, room temperature) spectra of Me-PABO and Me-PABS in different solvent ( $1.0 \times 10^{-5}$  M).

**Table S2** The photophysical data of Me-PABO and Me-PABS in different solvents.

| Compound       | Fluorescence           | Cyclohexane | Toluene | Dichloromethane | <i>N,N</i> -dimethylformamide |
|----------------|------------------------|-------------|---------|-----------------|-------------------------------|
| <b>Me-PABO</b> | $\lambda_{em}^a$ (nm)  | 449         | 453     | 460             | 464                           |
|                | FWHM <sup>b</sup> (nm) | 21          | 21      | 27              | 29                            |
| <b>Me-PABS</b> | $\lambda_{em}^a$ (nm)  | 459         | 463     | 469             | 472                           |
|                | FWHM <sup>b</sup> (nm) | 18          | 21      | 26              | 29                            |

<sup>a</sup> The peak wavelength of the PL spectrum. <sup>b</sup> Full width at half maximum.

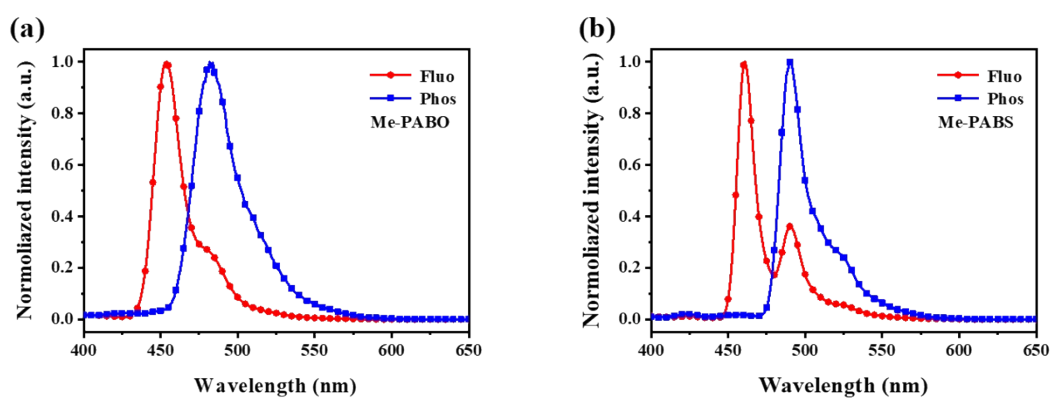

**Figure S3.** The low-temperature (77K) fluorescence and phosphorescence spectra of Me-PABO and Me-PABS in toluene.

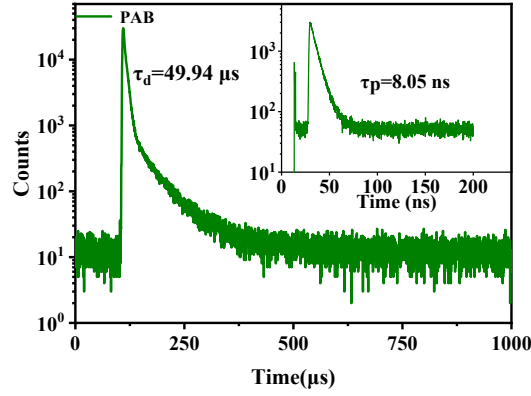

**Figure S4** Transient PL decay spectra of PAB doped into PPF films (5 wt%) at room temperature under  $N_2$  (inset: prompt components).

**Calculation Formulas for the Photophysical Parameters:** The evaluations of exciton dynamic rate constants were calculated by equation S1-S6<sup>1-3</sup>

$$k_p = 1/\tau_{PF} \quad \text{Equation S1}$$

$$k_d = 1/\tau_{DF} \quad \text{Equation S2}$$

$$k_F = \Phi_{PF}/\tau_{PF} \quad \text{Equation S3}$$

$$\Phi = k_F/(k_F + k_{IC}) \quad \text{Equation S4}$$

$$\Phi_{PF} = k_F/(k_F + k_{IC} + k_{ISC}) \quad \text{Equation S5}$$

The total PLQY of the emitter-doped PPF films is high enough. And phosphorescence was not observed at room temperature. Therefore, it is reasonably assumed that 1)

$k_r^S \gg k_{nr}^S, k_r^T, k_{nr}^T$  and 2)  $k_{RISC} \gg k_r^T, k_{nr}^T$ . Where  $k_r^S$  and  $k_{nr}^S$  are the rate constants for radiative and non-radiative decay from  $S_1$ ,

$k_r^T$  and  $k_{nr}^T$  are the rate constants of radiative and non-radiative decay from  $T_1$ , respectively. It is experimentally observed that

$k_p \gg k_d$  (Table.S2), then  $k_p \approx k_r + k_{ISC} + k_{RISC}$  and  $k_p k_d \approx k_r k_{RISC}$ . When

$k_{ISC} \gg k_{RISC}$ ,  $k_p$  can be expressed as  $k_p \approx k_r + k_{ISC}$ , and  $k_{RISC}$  is obtained as:

$$k_{RISC} = k_p k_d / (k_p - k_{ISC}) \quad \text{Equation S6}$$

**Table S3** The photophysical parameter of PAB, **Me-PABO** and **Me-PABS** (5 wt% doped in PPF).

| compound       | $\Phi/\Phi_{\text{PF}}/\Phi_{\text{DF}}$ | $\tau_{\text{PF}}(\text{ns})/\tau_{\text{DF}}(\mu\text{s})$ | $k_p$<br>( $10^8 \text{ s}^{-1}$ ) | $k_d$<br>( $10^4 \text{ s}^{-1}$ ) | $k_F$<br>( $10^7 \text{ s}^{-1}$ ) | $k_{\text{IC}}$<br>( $10^6 \text{ s}^{-1}$ ) | $k_{\text{ISC}}$<br>( $10^7 \text{ s}^{-1}$ ) | $k_{\text{RISC}}$<br>( $10^4 \text{ s}^{-1}$ ) |
|----------------|------------------------------------------|-------------------------------------------------------------|------------------------------------|------------------------------------|------------------------------------|----------------------------------------------|-----------------------------------------------|------------------------------------------------|
| <b>PAB</b>     | 0.651/0.511/0.140                        | 8.05/49.94                                                  | 1.24                               | 2.01                               | 6.33                               | 3.41                                         | 2.67                                          | 2.55                                           |
| <b>Me-PABO</b> | 0.875/0.401/0.474                        | 6.12/61.75                                                  | 1.6                                | 1.6                                | 6.42                               | 9.12                                         | 8.67                                          | 3.50                                           |
| <b>Me-PABS</b> | 0.921/0.415/0.506                        | 3.15/39.67                                                  | 3.17                               | 2.52                               | 13.16                              | 11.29                                        | 17.42                                         | 5.59                                           |

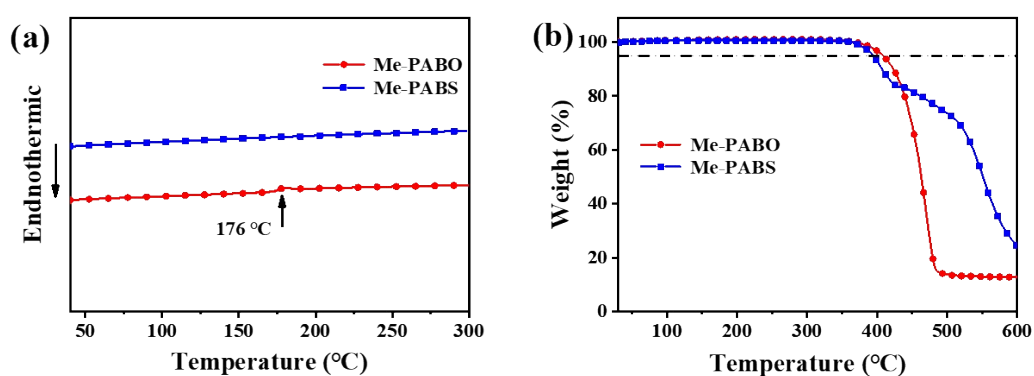

**Figure S5.** (a) DSC and (b) TGA curves of Me-PABO and Me-PABS.

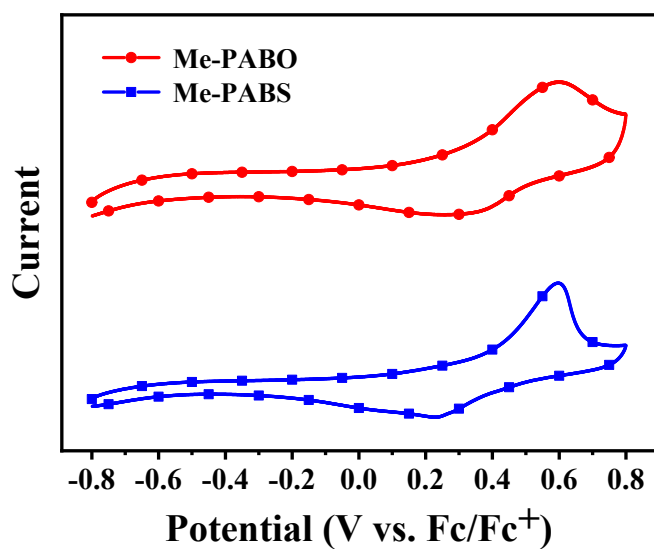

**Figure S6.** Cyclic voltammogram of Me-PABO and Me-PABS.

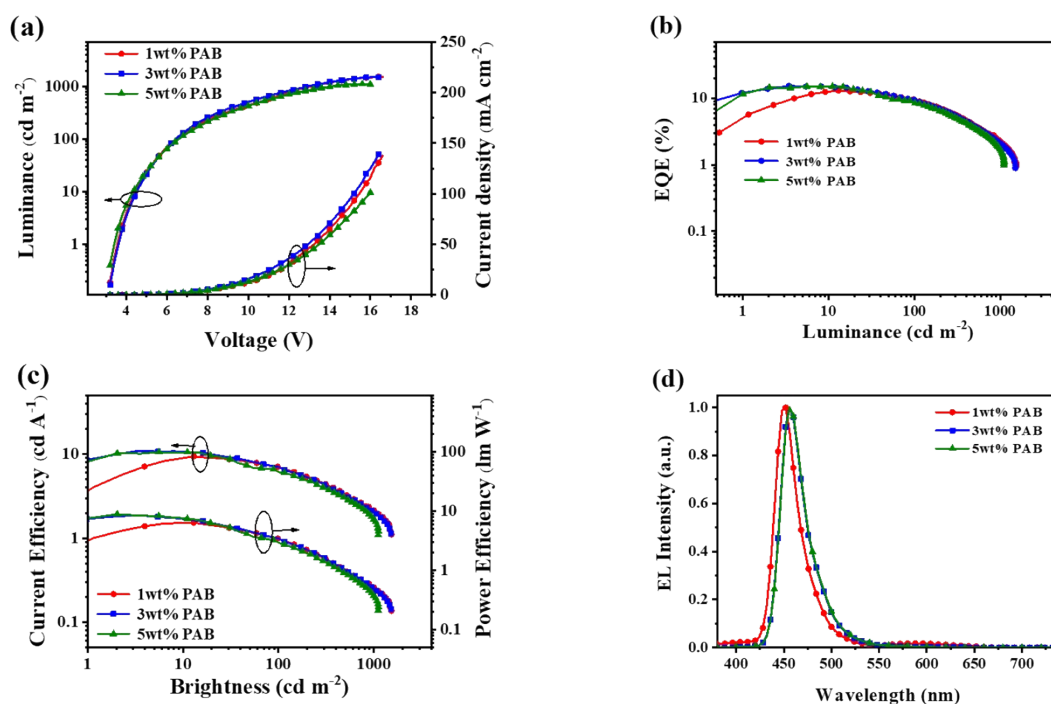

**Figure S7.** EL characteristics of PAB-based device: (a) Current density-voltage-brightness (J-V-B) characteristics; (b) EQE-brightness curves; (c) current efficiency-brightness-power efficiency curves; (d) normalized EL spectra at 6 V. The device structures were ITO/MoO<sub>3</sub> (10 nm)/TAPC (60 nm)/mCP (10 nm)/PPF: x wt% PAB (20 nm, x=1, 3, 5)/PPF (10 nm)/TmPyPB (30 nm)/LiF (1 nm)/Al (100 nm).

**Table S4** The EL performances of OLEDs based on **PAB**.

| Compound   | $V_{on}^a$ (V) | $L_{max}^b$ (cd m <sup>-2</sup> ) | $CE_{max}^b$ (cd A <sup>-1</sup> ) | $PE_{max}^b$ (lm W <sup>-1</sup> ) | $EQE_{max}^b$ (%) | $\lambda_{EL}^c$ /FWHM <sup>c</sup> (nm) | CIE <sup>d</sup> (x, y) |
|------------|----------------|-----------------------------------|------------------------------------|------------------------------------|-------------------|------------------------------------------|-------------------------|
| PAB (1wt%) | 3.6            | 1540                              | 9.43                               | 6.43                               | 13.1              | 452/30                                   | (0.147, 0.052)          |
| PAB (3wt%) | 3.6            | 1612                              | 10.97                              | 8.61                               | 15.3              | 456/30                                   | (0.138, 0.075)          |
| PAB (5wt%) | 3.4            | 1651                              | 10.61                              | 8.33                               | 15.1              | 456/30                                   | (0.138, 0.073)          |

<sup>a</sup> Voltage at 1 cd m<sup>-1</sup> (V). <sup>b</sup> Maximum luminance (cd m<sup>-1</sup>); Maximum current efficiency (cd A<sup>-1</sup>); Maximum power efficiency (lm W<sup>-1</sup>); Maximum external quantum efficiency (%). <sup>c</sup> The peak of the EL spectrum; Full width at half maximum of EL spectrum. <sup>d</sup> Commission Internationale de l'Eclairage coordinates.

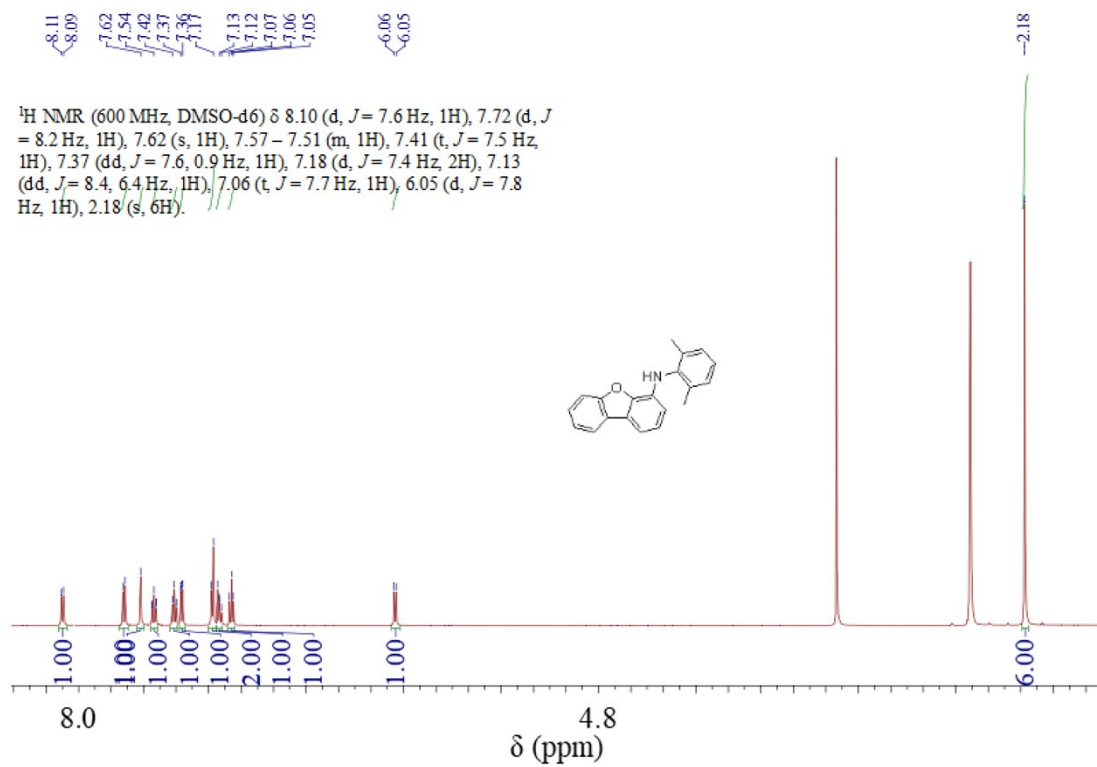

**Figure S8.** <sup>1</sup>H NMR spectrum of 1 in DMSO-d<sub>6</sub>.

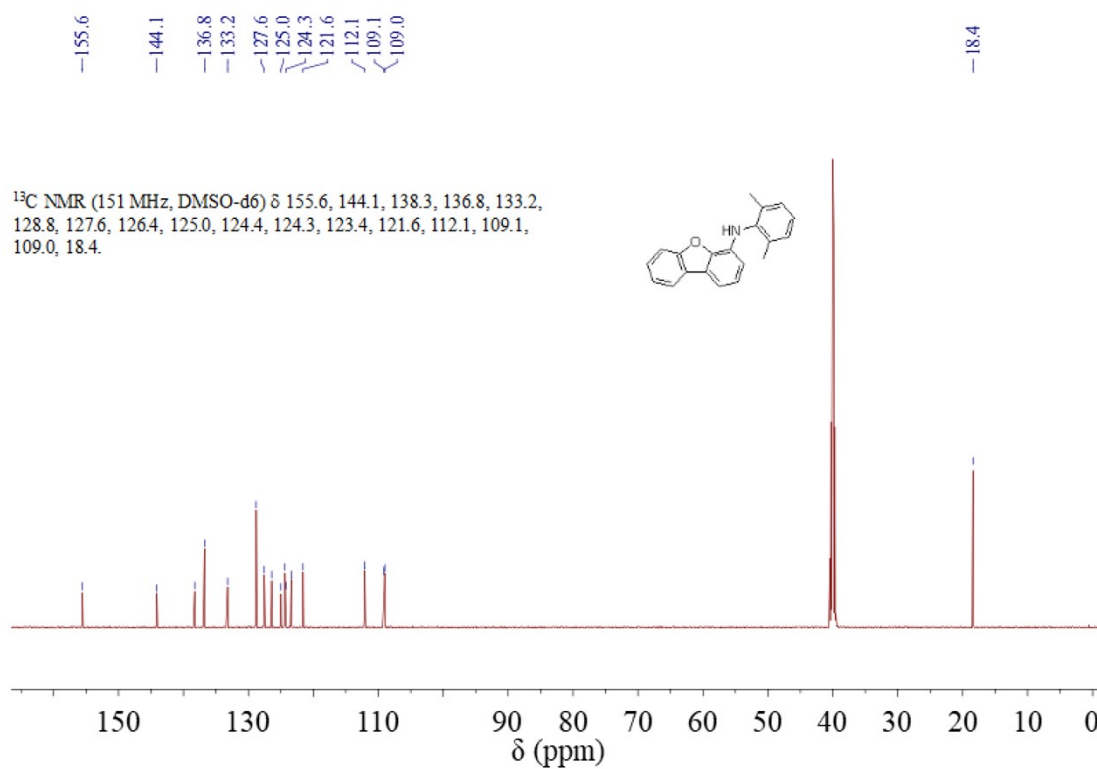

**Figure S9.** <sup>13</sup>C NMR spectrum of 1 in DMSO-d<sub>6</sub>.



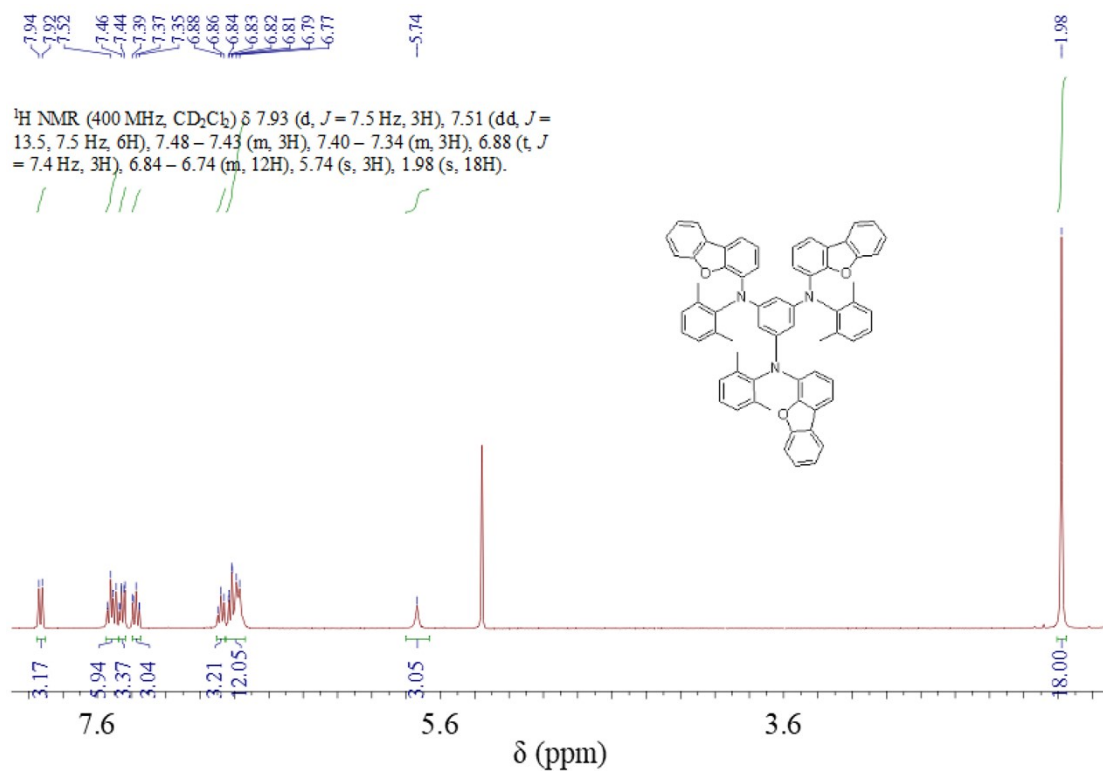

**Figure S10.**  $^1\text{H}$  NMR spectrum of 2 in  $\text{CD}_2\text{Cl}_2$ .

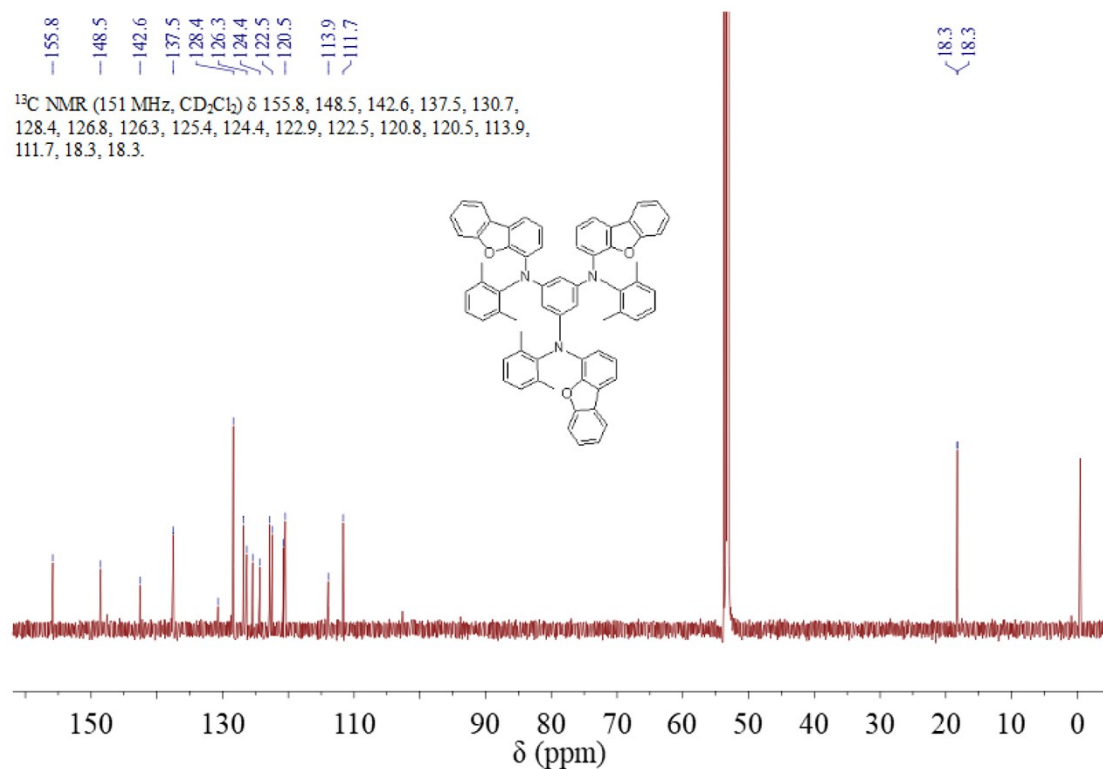

**Figure S11.**  $^{13}\text{C}$  NMR spectrum of 2 in  $\text{CD}_2\text{Cl}_2$ .

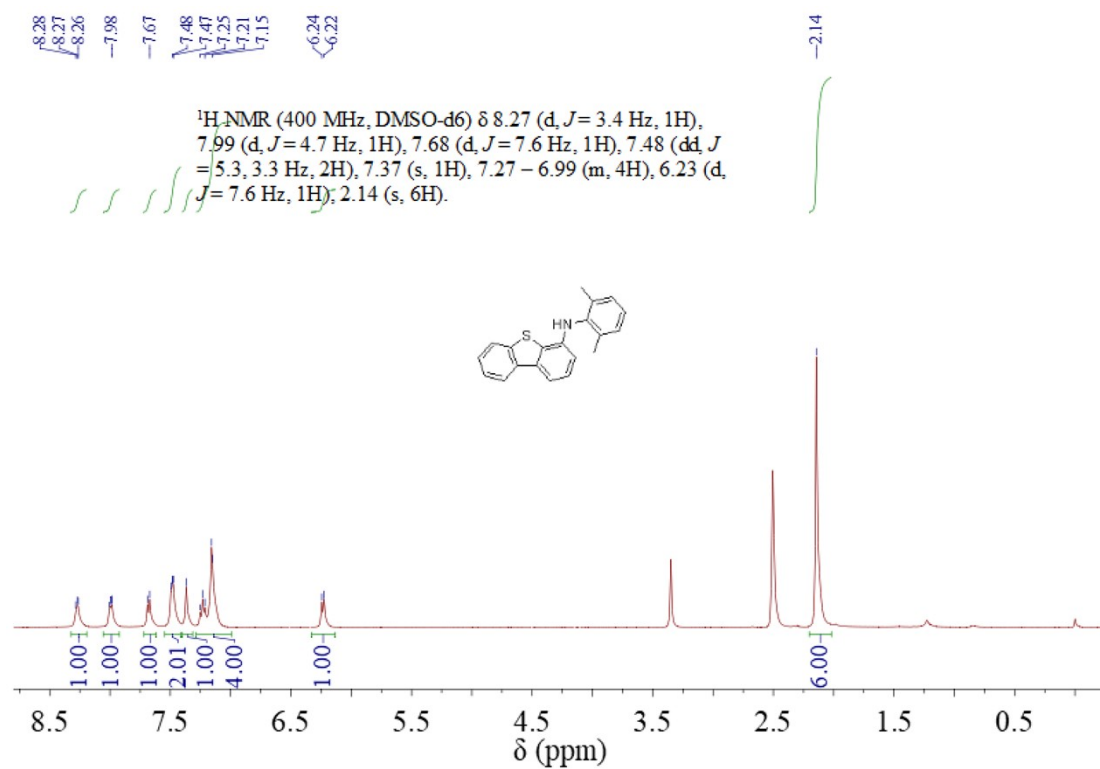

**Figure S12.**  $^1\text{H}$  NMR spectrum of 3 in DMSO- $d_6$ .

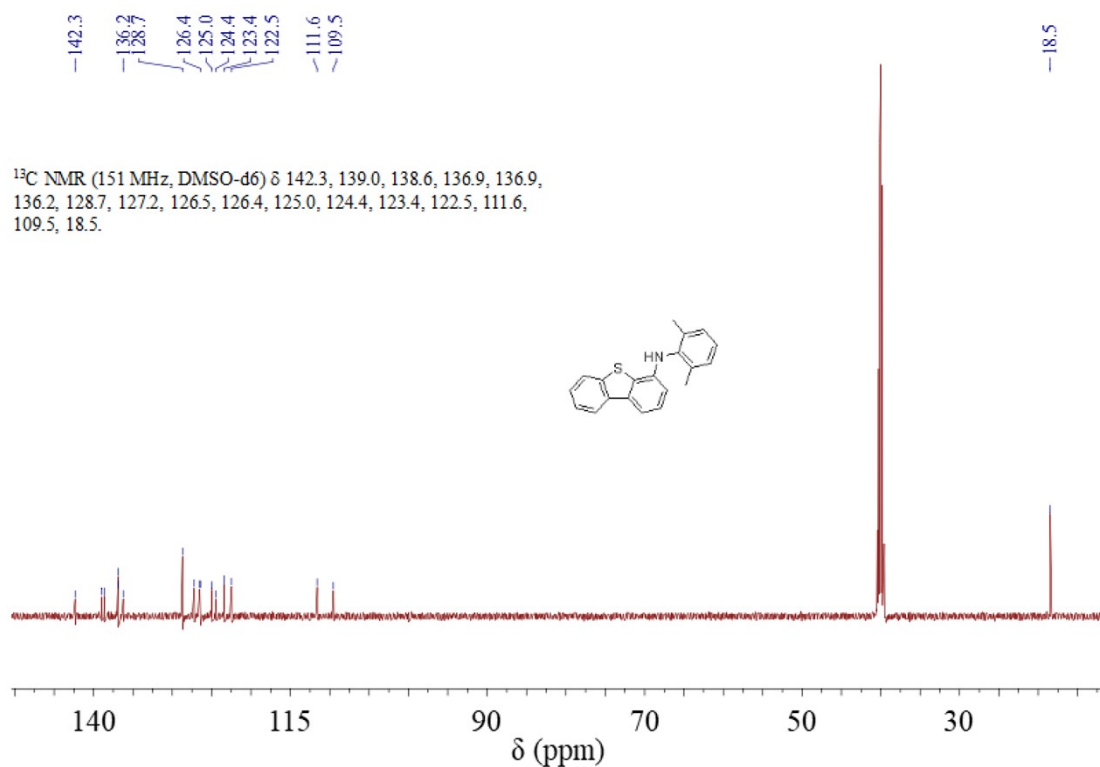

**Figure S13.**  $^{13}\text{C}$  NMR spectrum of 3 in DMSO- $d_6$ .

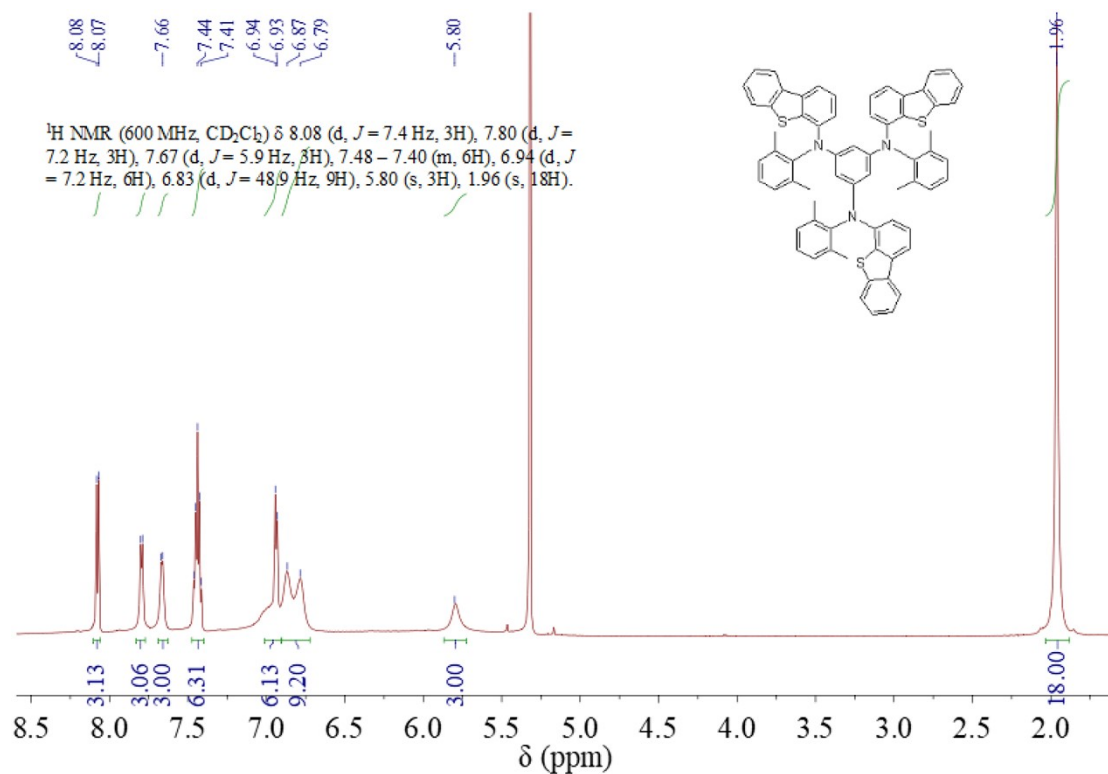

**Figure S14.**  $^1\text{H}$  NMR spectrum of 4 in  $\text{CD}_2\text{Cl}_2$ .

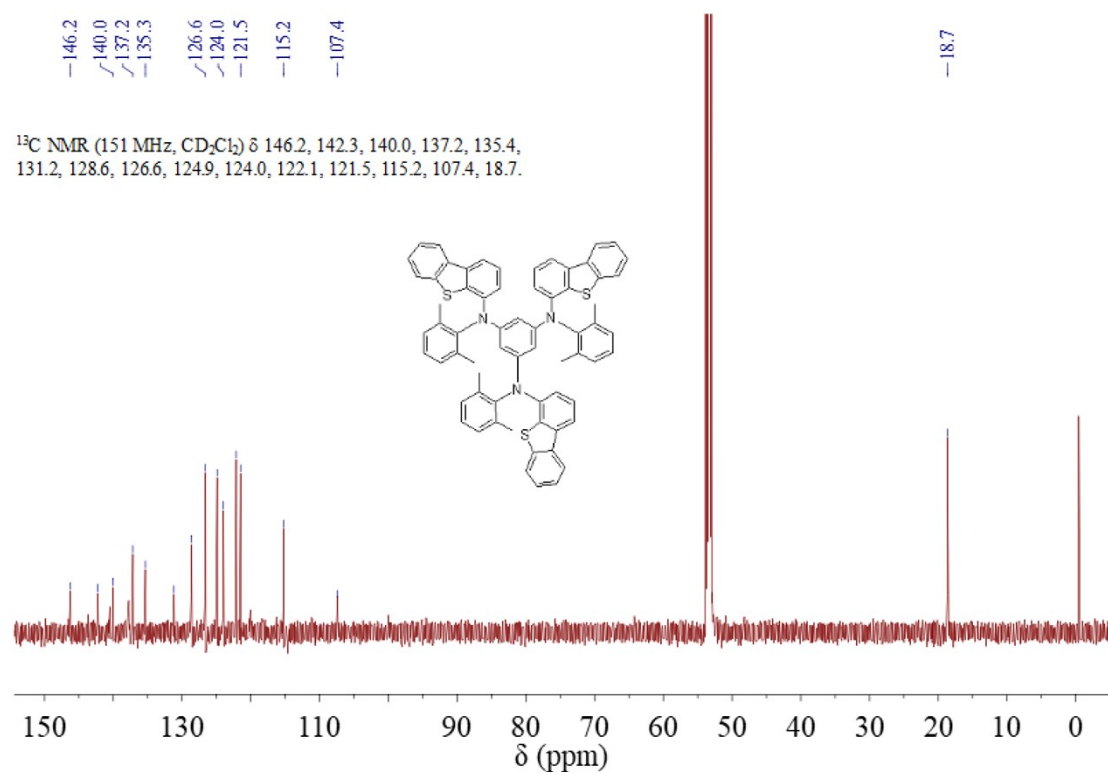

**Figure S15.**  $^{13}\text{C}$  NMR spectrum of 4 in  $\text{CD}_2\text{Cl}_2$ .

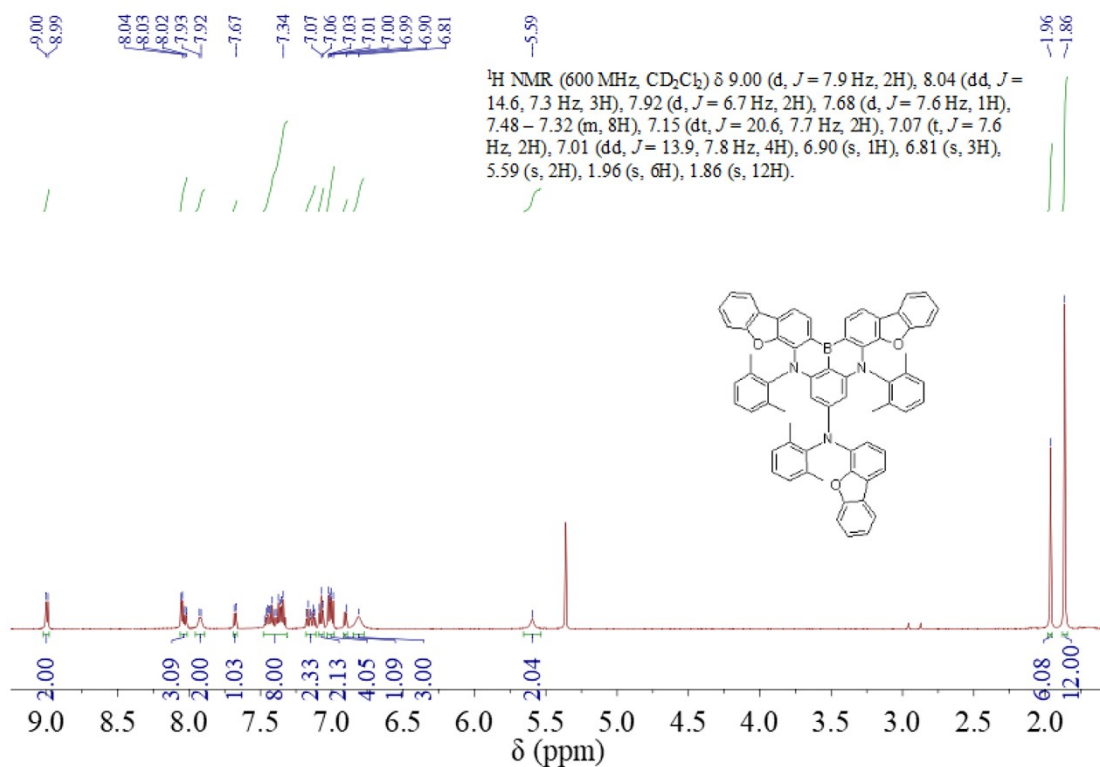

**Figure S16.**  $^1\text{H}$  NMR spectrum of Me-PABO in  $\text{CD}_2\text{Cl}_2$ .

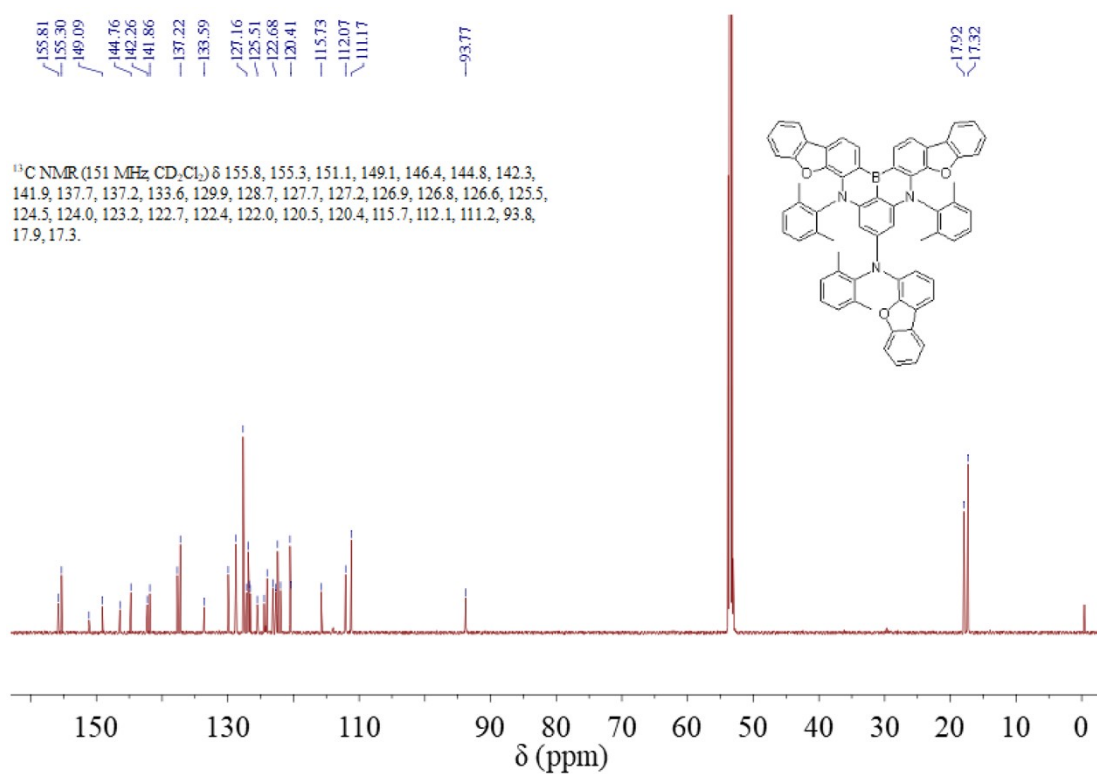

**Figure S17.**  $^{13}\text{C}$  NMR spectrum of Me-PABO in  $\text{CD}_2\text{Cl}_2$ .

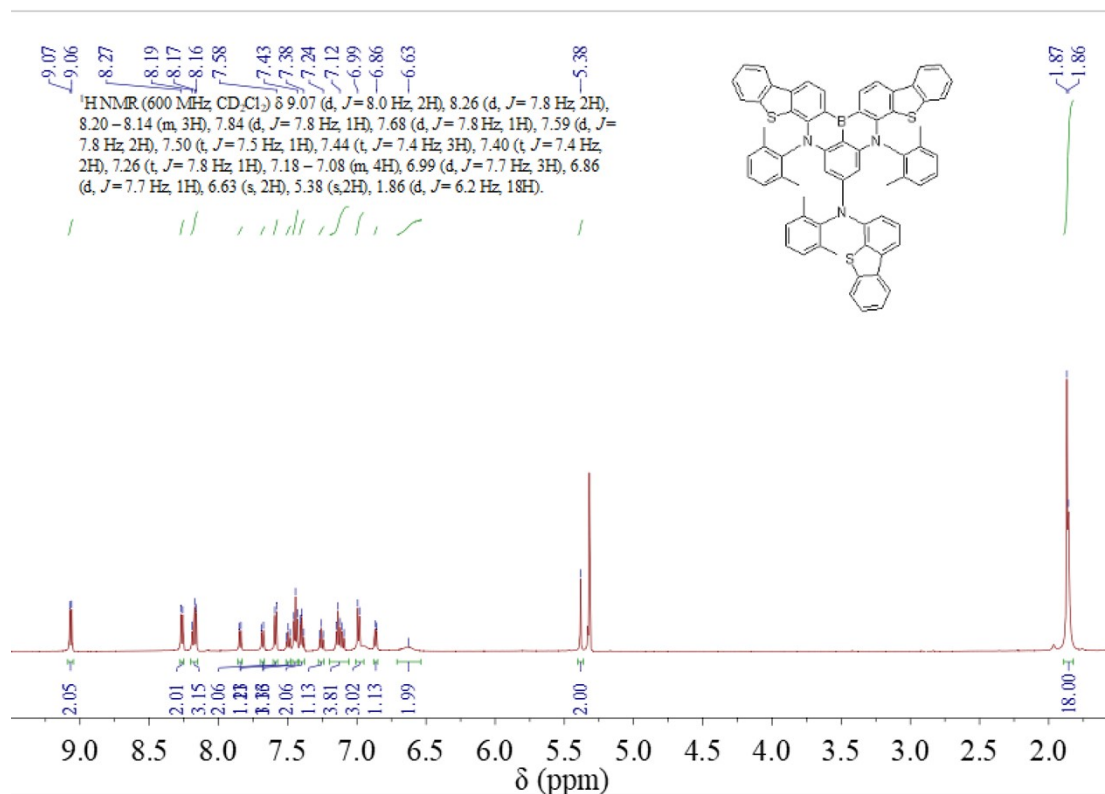

**Figure S18.** <sup>1</sup>H NMR spectrum of Me-PABS in CD<sub>2</sub>Cl<sub>2</sub>.

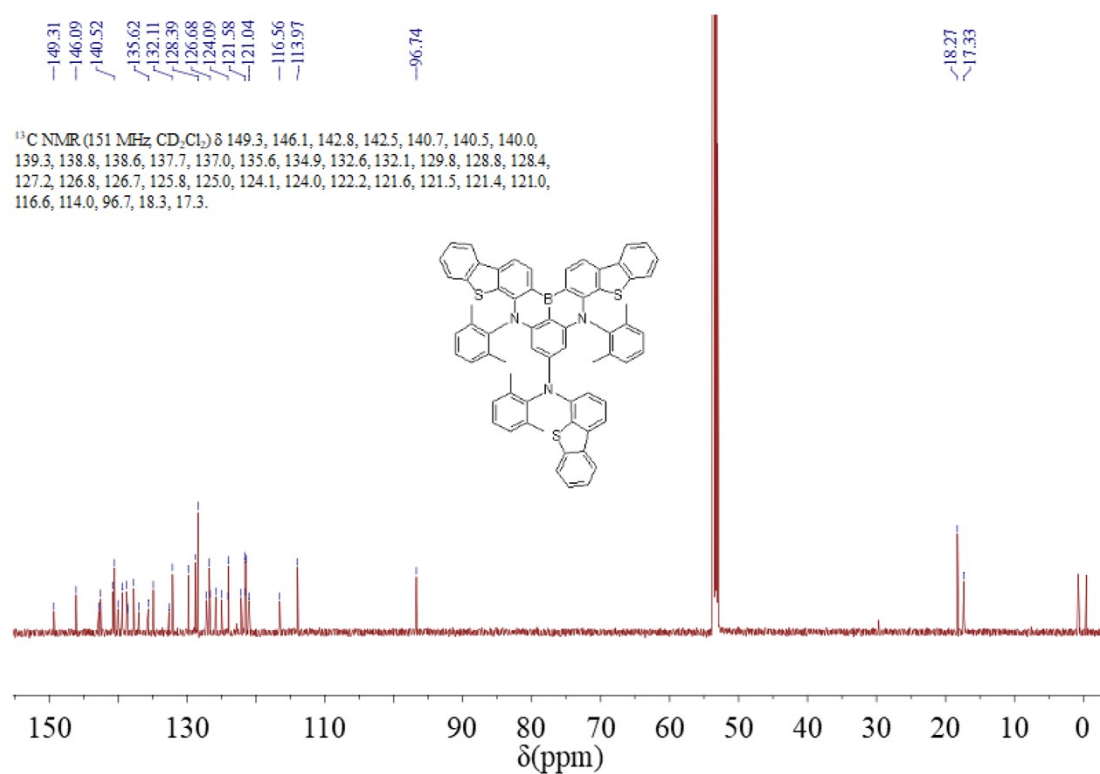

**Figure S19.** <sup>13</sup>C NMR spectrum of Me-PABS in CD<sub>2</sub>Cl<sub>2</sub>.

## References

1. Q. Zhang, H. Kuwabara, W. J. Potscavage, Jr., S. Huang, Y. Hatae, T. Shibata and C. Adachi, *J. Am. Chem. Soc.*, 2014, **136**, 18070-18081.
2. S. Oda, B. Kawakami, Y. Yamasaki, R. Matsumoto, M. Yoshioka, D. Fukushima, S. Nakatsuka and T. Hatakeyama, *J. Am. Chem. Soc.*, 2022, **144** 106-112.
3. Y. Kondo, K. Yoshiura, S. Kitera, H. Nishi, S. Oda, H. Gotoh, Y. Sasada, M. Yanai and T. Hatakeyama, *Nat. Photon.*, 2019, **13**, 678-682.
